# Supplementary material for: The Antibacterial and Antioxidant Roles of Buckwheat Honey (BH) in Liquid Preservation of Boar Semen
Source: Biomed Res Int. 2021 Jun 2;2021:5573237. doi: 10.1155/2021/5573237 (PMC8192209; doi:10.1155/2021/5573237)
Supplement: Supplementary Materials — The following are available online. Figure S1: morphological characteristics of sperm after the hypo-osmotic swelling test (HOST). (a) No swollen sperm; (b) swollen sperm with curly tails; (c) swollen sperm with an oncotic tail tip. Figure S2: morphological characteristics of sperm after boar semen-stained with Wright's-Giemsa solution; (a) sperm with intact acrosome; (b) sperm with incomplete acrosome. Figure S3: CAT activity of E3 group (adding semen group and nonadding group). Results are expressed as mean ± SD. ∗∗∗p < 0.001. Table S1: major physicochemical parameters of BH including total sugar, moisture content, pH, and color. Table S2: the osmolarities of sodium citrate buffer with different concentrations of BH addition. Table S3: relative abundances of dominant phyla among different extenders. Table S4: relative abundances of dominant genus among different extenders. [file 5573237.f1.zip]

Archive with 7 entries (7 files):
- Fig S1.zip
- Fig S2.zip
- Fig S3.zip
- Table S1.docx
- Table S2.docx
- Table S3.docx
- Table S4.docx
